# Supplementary material for: A halotolerant growth promoting rhizobacteria triggers induced systemic resistance in plants and defends against fungal infection
Source: PubMed Central journal article supplement (PMC6411892; doi:10.1038/s41598-019-40930-x), 2019-03-11
Supplement: 41598_2019_40930_MOESM1_ESM.pdf [file 41598_2019_40930_MOESM1_ESM.pdf]

Supplementary information

Title:

**A halotolerant growth promoting rhizobacteria triggers induced systemic resistance in plants and defends against fungal infection**

Sandeep Sharma<sup>1†</sup>, Chen Chen<sup>2</sup>, Sudhir Navathe<sup>3</sup>, Ramesh Chand<sup>3</sup>, Shree P. Pandey<sup>4</sup>

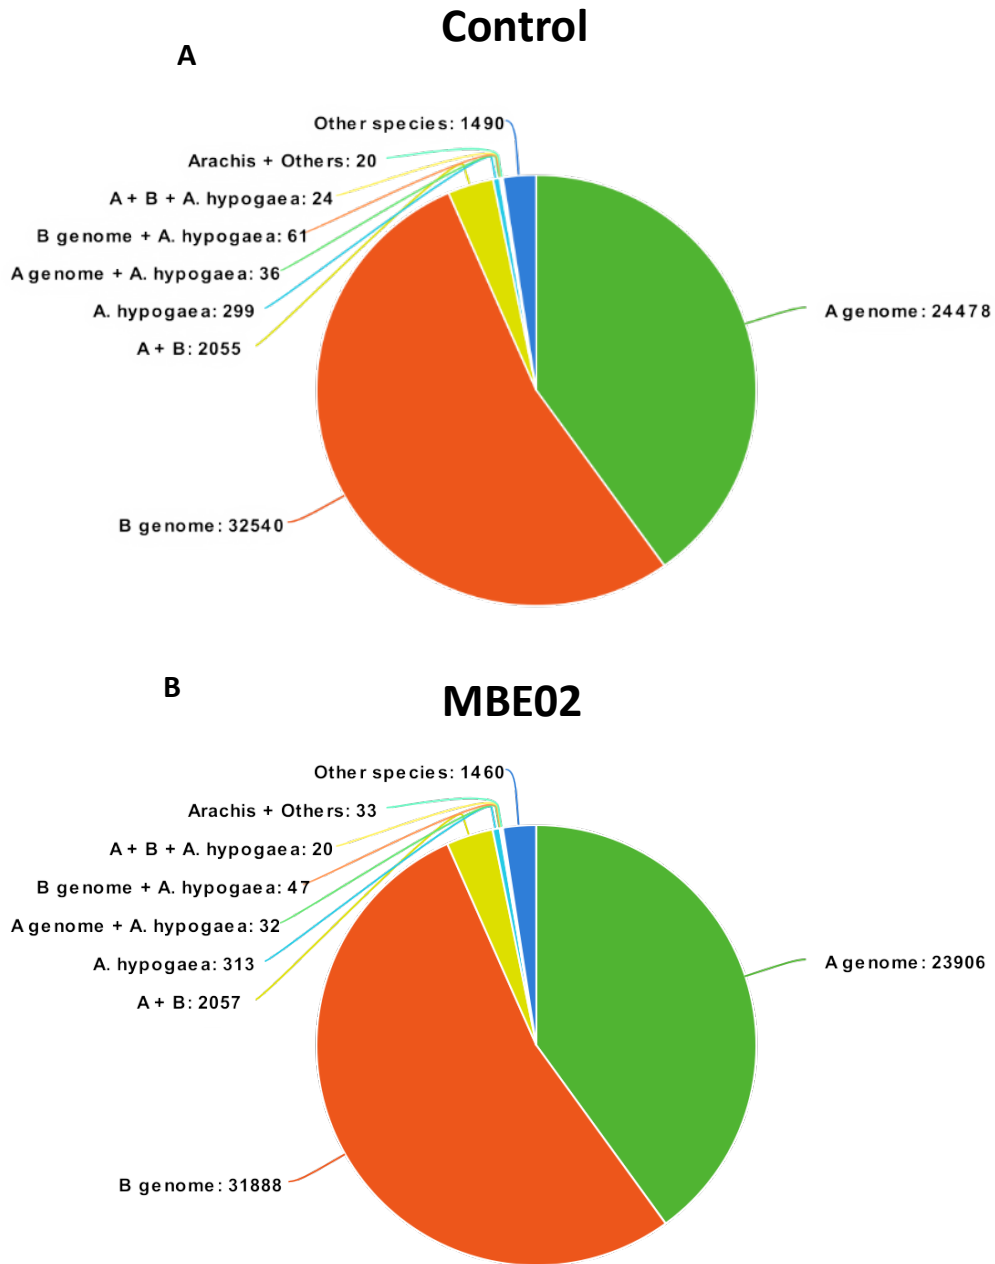

**Figure S1:** Pie chart shows blast hit distribution of CDS of control **(a)** and MBE02 samples **(b)**. ‘A’ and ‘B’ genomes represent *A. duranensis* and *A. ipaensis*, respectively.

**A**

**Control**

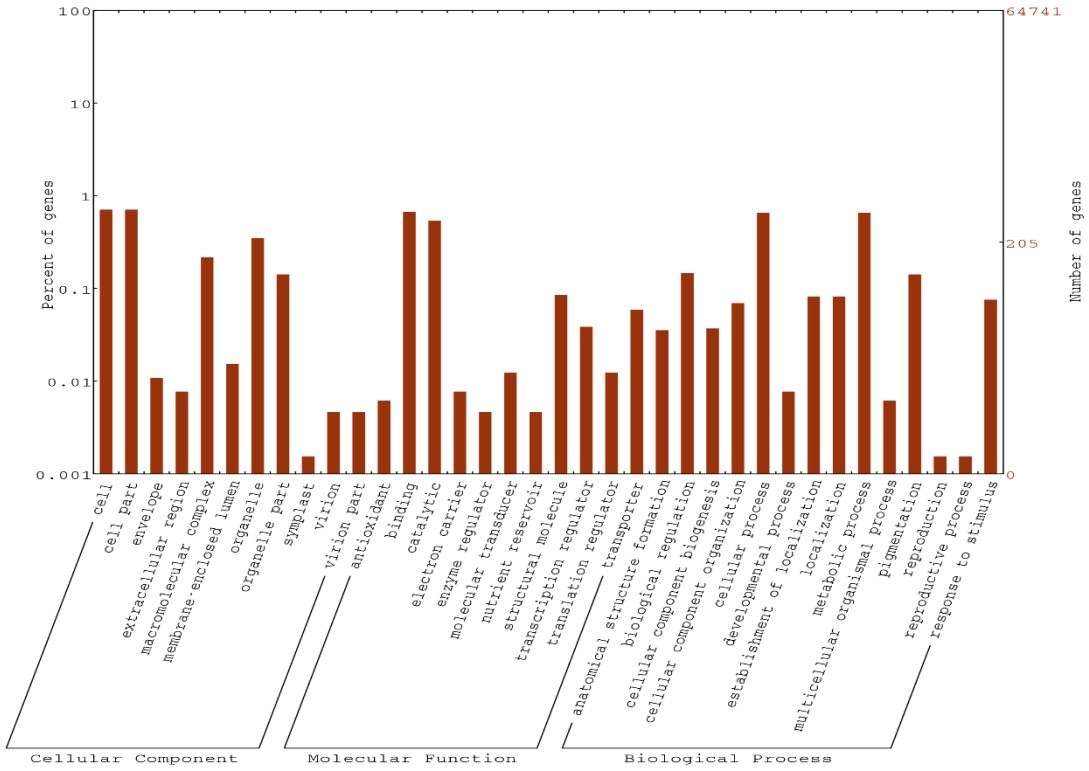

**B**

**MBE02**

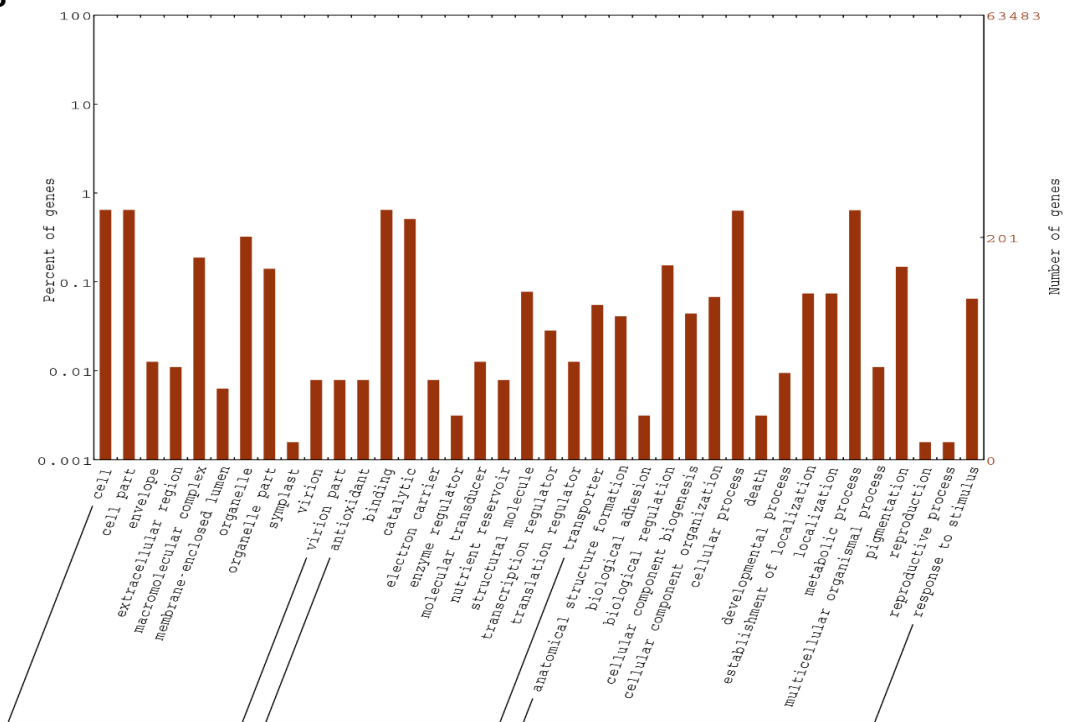

**Figure S2:** GO enrichment analysis of control and MBE02-treated samples. WEGO plot shows distribution of GO terms across three categories (biological, cellular and molecular functions) in control **(a)** and MBE02 treatment **(b)**

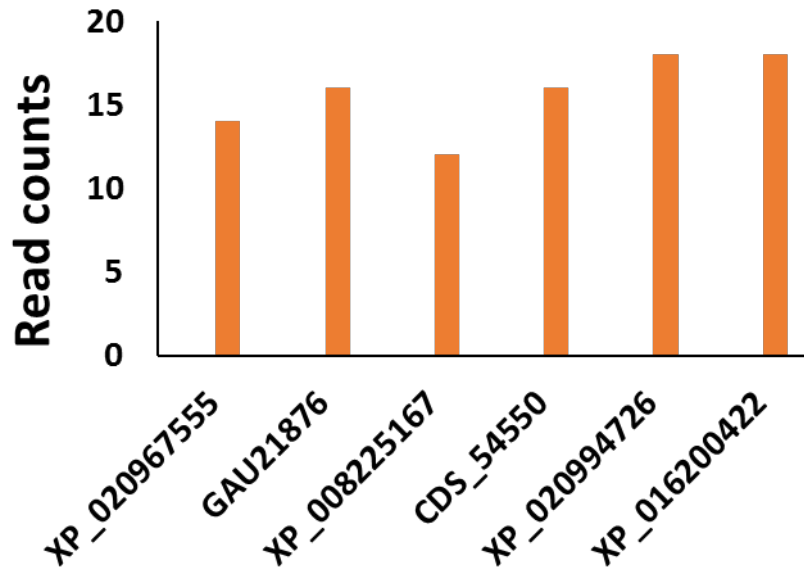

**Figure S3:** Read counts of CDS that expressed in MBE02-treatment but not in the control. XP\_008225167 encodes for EH domain containing protein 1 and XP\_016200422 encodes for DNA-directed RNA polymerase. Other four CDS remain uncharacterized.

```

XP_015953561.1 -----MVRAPPYDKYGVKKGAWSSREEDQRLIAFVQRYGHSNWRQ
AtMYB72 -----MGKGRAPCCDKNKVKRGPWSPQEDLTLITFIQKHGHQNWRS
XP_020984775.1 -----MMSKDKKEEEKKNKSKNKLKRLKGLWSPEEDEKLMRYMNNNGQGCGIGE
XP_016177474.1 -----MEMEYTSVVHIMRSLSDCGSSVTNGSEEDMEIRKGPWTEEDSALLNHITTYGEGHWS
XP_016201689.1 -----MNTATSTTAVTRKDMDIRKGPWSPEEDDALQKLVKHXGPRNWSL
XP_015972562.1 -----MDRVKGPWSPEEDELRLRLVGAHGPRNWTI
XP_015934294.1 MEALNRRSSSCTASSDSSSSSESTQRNPNRPERIKGPWSAEEDRILTRLVERYGARNWSL
: * * : * * * : * * *

XP_016188339.1 LPKFAGLARCGKSCRLRWIMNYLRPNLKRGNFTQEEEEACIIKLHSLKGNRWSAIAAELPGR
XP_015953501.1 LPKFAGLARCGKSCRLRWIMNYLRPNLKRGNFTQEEEEACIIKLHSLKGNRWSAIAAELPGR
XP_015953561.1 LPKFAGLARCGKSCRLRWLNLYLRPNLKHGNYTQEEEELIIKLHQQLGNRWSLIAERLPGR
AtMYB72 LPKLAGLLRCGKSCRLRWLNLYLRPNLKRGNFSKKEEDAIIHYHQLGNKWSKIASFLPGR
XP_020984775.1 VARNAGLQRCGKSCRLRWLNLYLRPNLKRGAFSPOEQQLIIHLHSLKGNRWSQIAAQLPGR
XP_016177474.1 VARSAGLKRSKGKSCRLRWLNLYLRPNLKRGNITLEEQLLILDHLSRWGNRWSKIAEQLPGR
XP_016201689.1 ISKSIPIG-RSGKSCRLRWCNQLSPQVEHRAFPEEDDTIIRAHARFGNKNWATIAARLLSGR
XP_015972562.1 ISKSIPIG-RSGKSCRLRWCNQLSPVEHRAFPEEDDTIIRAHAEFGNKNWATIAARLLNGR
XP_015934294.1 ISRYIKG-RSGKSCRLRWCNQLSPTVEHRPFSSHEDDTIIAHAHQYGNRWTIAARLLPGR
: : * * * * * * * * * * : : : * * : * * * * * * * * * *

XP_016188339.1 TDNEIKNHWHHTLKKRFQTNEEEESETATKSKPKETTQISAESNTTTTSPLSPLSSSSEFS
XP_015953501.1 TDNEIKNHWHHTLKKRFQTNEEEE-----KPKETTQISAESNTTTTSPLSPLSSSSEFS
XP_015953561.1 TDNEIKNHWHSHLKKLSSKNWNNEINPSSSESESESKSNPIPDDILEGKHTNQPKDSVSP
AtMYB72 TDNEIKNVWINTHLKKRLTPSSSSSSLSSTHDQSTKADHDKNCDGAQEEIHSGLN-ESQNS
XP_020984775.1 TDNEIKNFWINSTIKKRCITITSSSTSQNTSEYSSWLEPHDHNNMEGFTMMPMFSCSSS
XP_016177474.1 TDNEIKNYWTRVVKQAKQLKCDVNSKQFRDALRYVWMPRLIEQIQAGGRSTMCVQSQARE
XP_016201689.1 TDNAIKNHWINSTLKRKCSMGPIDDPHFAQPLKRSVSAG--AAVPVSTGLYMNPPPTGPS
XP_015972562.1 TDNAVKNHWINSTLKRKCRSTASDAVTVAVYPAQPLKRS--ASVGP-----CHVTTPSSP
XP_015934294.1 TDNAVKNHWINSTLKRARRDQRGGSATGVHATCASLAAAPTNER-----ASC
*** : * * * : :

XP_016188339.1 SITSWDQSHNNNN--KNNMV-----LEDDDFAFLDGFSFWTEPYLAEILYE-----
XP_015953501.1 SRTSWDQSHNNNNNNKNNLV-----LEDDDFAFLDGFSFWTEPYLAEILHEQETVVTVPS
XP_015953561.1 SYDYVDSANNNKQHRVLES-----SSSTETSSYTDDEVGHSYSLTPNNVEQSTIMNN
AtMYB72 ATSSHHQGECHMTKPELHEV-----NGLNEIQFLLDHDDFDDITSEFLQDNDILFPLDS
XP_020984775.1 QSPSIIIDEHLPMPENNNM-----HAAMGINNNNNMNFVPLLESATTSNVYFDEOVN
XP_016177474.1 IYNPVTSVSMASSKSCSSFS-----GCEQFQASSVSDSCVSYSLMGSGSGGGGSE--
XP_016201689.1 SSGDVSSESVPAASTSHVFRPVPRAGGVVPPVETTSSSYDPPTLSLSLPGVDSNSEVSN
XP_015972562.1 SSGELSDPGLPLST-----PGSDPRTL LLSLSLPGSGSGGAGSD
XP_015934294.1 SSGALPPCTLP-----LEDDPLTALTLAPPIDRGS-----

XP_016188339.1 -----
XP_015953501.1 STSNVFDPCCEISVANENELELSSNNSTSSLFDLEKEFGSFLIEPTMMESFNTQPCVSES
XP_015953561.1 SPTSSDYCVVPSVSFEFFGG-----DFNTEPFIVAN
AtMYB72 LLHNHQTHISTQEMTREVTKSQSFDHPQPD-----IPCGFEDTNEESD
XP_020984775.1 TLHN-----KVSVEEDSLIS
XP_016177474.1 -----HAEKGATSS
XP_016201689.1 RGNEPSPHSAPPLTAIPLLPIMSAAVSATVAAVPAVATAPGTAPLAAQPLQQIRDPSAV
XP_015972562.1 -----SIKDGLGS
XP_015934294.1 -----G

XP_016188339.1 -----
XP_015953501.1 DDVSHIPFMPSPSEYFTTLCGSDPWSTPSTHLYDQHLSLFH-----
XP_015953561.1 NDAYANDEIIISGEDDVGLVPVLYESADFCNL-----
AtMYB72 LRRQLVESTTPNNEYDEWFNFIDNQTYFDDFNFVGEVCL-----
XP_020984775.1 MEDWLEEDLMIKSVSPPFLDFPLS-----
XP_016177474.1 STPFEPENGFGGADLWTDENIWF LQQQLADDDHL-----
XP_016201689.1 AAVPKQNGGAAPFNFAEL LAVMQDIRKEVRSYMAGLEQQSNNGMCFQAADGGFRNAS
XP_015972562.1 GLCPDPD---PAQMFSPFLAMMQEMVRKEVRNYMSMVEENG----VRMQQTEAIRNGV
XP_015934294.1 AMEAEQQRASPETSVSGFWDVMDRVIAREVREYVSSN-----FSDHSNIFH---

XP_016188339.1 -----
XP_015953501.1 -----
XP_015953561.1 -----
AtMYB72 -----
XP_020984775.1 -----
XP_016177474.1 -----
XP_016201689.1 VKRIGISRIDS-
XP_015972562.1 MKRMGIRGLER
XP_015934294.1 -----

```

**Figure S4.** Pair-wise sequence alignment of MYB sequences (up-regulated in MBE02 treatment) of peanut with *Arabidopsis* MYB72 (*AtMYB72*). MYB108 like (XP\_016177474.1) shows 92.5% sequence identity with *AtMYB72*.

**A**

BGLU42 -----MAQKLNLLNLAVP-----PVTHRSNFPSTFTFGVATSAYQIE  
 BGLU12 MGMGMAIAFLGLVALLVSNHSAPTPEGSTILSNDVTLNRSFPAQFIFGTASSAYQE  
 \*:\*:\* \* . : : \*\*:\*: \* \*\*:\*:\* \* \*

BGLU42 GGWIEGKGPSIWDKFTHEG-KILDGNSGDVAVDHYHRYKEDVDLIGLFGAYRFSIS  
 BGLU12 GAANEGGRGPSIWDTLTHQHPKVDGSDVAVDQYHRYKEDVAIMKYMINTDAYRFSIS  
 \*:\*:\* \*\*:\*:\*:\* \* . \* : \*\*:\*:\*:\* \*\*:\*:\*:\* \* : : . \*\*:\*:\* \*

BGLU42 WSRIFPDG-LGTEVNEEGIAFYNDLINTLLEKGIQPVYTLVHWDLPSHLQEAIGGWNRK  
 BGLU12 WSRI L PKG KISSGINQEGIKYNNLINELIANGLEPFATLHFHDLQALQDEYSGFYSPN  
 \*\*:\*:\* \* : : \*:\*:\* \*:\*:\* \* : : \*:\*:\* \*:\*:\* \* : \* : : \*

BGLU42 IVDYFGLYADACFANFGDRVKHMITLNEPLQTSVNGHCIGIFAPGRNEKPLIEPYLVSHH  
 BGLU12 IIKDFEDYSELCKEFGRVKHMITLNEPWSYVSG-----VDKPYLATHY  
 \* . \* \* : : \* : \*\*:\*:\*:\* \* . \*\* . : : \*\*:\*:\* \*

BGLU42 QVLAHATAVSIYRSKYKESQGQIGLSVDCEWAEPNEKPEKVAADRRIIDFQLGWFLDP  
 BGLU12 QLLAHAASVQIYKAKYQVSKGLIGITLNSGHLFYPYSNITLDVHAAQRALDFAGWFMEP  
 \*:\*:\*:\* \*:\*:\*:\* \* \*\* \* \* : : . \* \* \* : : \* \*\*:\*:\* \* \*\*:\*:\* \* \*\*:\*:\* \*

BGLU42 LFFGDYPASMRQKLGDNLPRFTEEKFMNQSNDFLGLNHYSRLISHVSNKEAESN-F  
 BGLU12 ITRGKYPRSMEKYVGSRLPNFTEEQSKQLIG-SFDIGLNYTISNYAAHLFHPNNDTDP  
 : \* \*\* \* : : \* : \*\* \* \* : : : \* \*\* \* : : : \* : : : : \*

BGLU42 YQAQELERIVELENGDLIGERAASDNLYAVPHGIRKTLNYMSKYNHPPIFITENGMDDE  
 BGLU12 YWTDQHWLTSERNGIPIGPRAASSMLVYYPKGEELLYITKTYNPLIYITENGIDF  
 \* : : . : . \* \* \* \* \*\*:\*:\*:\* \* \* : : \* : \* : \* \* \*\*:\*:\* \*

BGLU42 DGSASIDHMLDDKRRVDYFKSYLANVSOAIEDGVDIKGYFAWSSLDNFENAGYTKRFG  
 BGLU12 NDPTLSLEALIDTFRIDYHRYHYVSTAIDGANVKGYFAWSSLDNFENAGYTKRFG  
 : \* : : \* \* . \* : \* \* \*\*:\*:\*:\* \* \*\*:\*:\*:\* \* \*\*:\*:\*:\* \* \*\*:\*:\* \*

BGLU42 LVYVDYKNGLRHPKKSAYIFMFKLKGDEENKGGKE  
 BGLU12 INFVDYKDNLKRHQKLSGHVFRDFLKKN-----  
 : : \*\*:\*:\* \* \*\* \* : \* \*\* \* : \*

**B**

MYC2 MTDYRLQPTMNLWTTDDNASMMEAFMSSSDISTLWPPASTTTTTATTETPTPAMEIPAQ  
 MYC4 -----MNLWTTDDN-SSVMEAFMSSSDLSLWPPP-----PPPPQSASSA  
 \* \* \* \* \* \* : : \* : \*\*:\*:\*:\* \* \*\*:\*:\*:\* \* \*\*:\*:\* \*

MYC2 AGFNQETLQQRQLALIEGTHEGWYAIWFQPSYDFSG--ASVLGWGDGYKGEEDKANP  
 MYC4 AVFNQDTLQQRQLALIEGARESWYAIWFQSSYDYPSSASTAVLWGDGYKGEEDKGG--  
 \* \*\*:\*:\*:\*:\*:\*:\* \* \*\*:\*:\*:\* \* \*\*:\*:\* \* \*\*:\*:\* \* \*\*:\*:\* \*

MYC2 RRRSSPPFPSTPADQYRKKVLRLEWLSISGGVAPSDDAVDEEVTDEWFFLVSMTQSF  
 MYC4 --KAKSTKTTPAEQDHRKKVLRLEWLSISGSAAPSDVEEVTDEWFFLVSMTQSFV  
 : : \* : \* : \* : \*\*:\*:\*:\* \* \*\*:\*:\* \* \*\*:\*:\* \* \*\*:\*:\* \*

MYC2 CGAGLAGKAFATGNAMVWVSGDQLSGSGCERAKQGGVFGMHTIACIPSAIVGVGSTEP  
 MYC4 SGTGLPQAFYHSSPWLTGPDRLAGSSCERARQGVFGLQTLVCIPSSINGVVELGSTEM  
 \* . \* : \* : \* : \*\*:\*:\* \* \*\*:\*:\* \* \*\*:\*:\* \* \*\*:\*:\* \* \*\*:\*:\* \*

MYC2 IRQSSDLINKVRILNFDG--AGDLSGLNINLDPDQGENDP--MINDP-----  
 MYC4 IFQPDLMNKVRILNFNNSIDVGSNPLTGSTTTAADQGENDPSSLNNDSEIRDSV  
 \* \* : \* \*\*:\*:\*:\* \* : : \* : \* . . . \* \*\*:\*:\* \* \*\*:\*:\* \*

MYC2 -----IGTPGSNEPGNAPSQSSQLFSKIQFENGSSSITENPNLDPTSPVHSQTQN  
 MYC4 TTVTTVTTTTPASVISVNPSSALAEPTSVHLNNNNTHAGGASQSNRSFFSRELNF  
 \* . : . . . \* : \* : \* : \* : \* : \* : \* : \* : \*

MYC2 PKFNNTFSRELNFTSSSTLVKPRSGEILNFGDE-----GKRSSGNPDPSSYSQQTQ  
 MYC4 SEFGDGSNAVKTGNGQHSLKPESGEILSFGESKRSSYGGGGGGGGGNANFFSGQSQ  
 : : \* . \* : : . . . \* \*\*:\*:\* \* \*\*:\*:\* \* . \* : : \* \*\*:\* \*

MYC2 FENKRKRSMLNEDKVSFG-----DKTAGESDHSLEASVV  
 MYC4 FVAAAEDNNGKRSNPNRSGSNDDGMLSFTSGVILPPSNMKSXGGGGSDHSLEASVV  
 \* . : . . . \* \* . : . . . \* : \* : \* : \* : \* : \*

MYC2 KEVAVE-----KRPKKRGRKPANGREEPLNHVEAERQRREKLNQRFYALRAVVPNVSKM  
 MYC4 KENESSRVVEPEKRPKRGRKPANGREEPLNHVEAERQRREKLNQRFYALRAVVPNVSKM  
 \*\* \* \* \* \* \* \* \* \* \* \* \* \* \* \* \* \* \* \* \* \* \* \* \* \* \* \* \* \* \*

MYC2 DKASLLGDAIAYINELKSKVVKTESEKLQIKNQLEEVKLELAGRKASASGG-----  
 MYC4 DKASLLGDAISYITELKSKLQTLSEDKDLEKQLDLSKKDLNWKKEASSAPPLPKDEL  
 \*\*:\*:\*:\* \* \*\*:\*:\* \* \*\*:\*:\* : : \*\*:\*:\* \* : \* \* \* \*\*:\*:\* \*

MYC2 --DMSSSSSIKPVGMEIEVKIIGWDMIRVESKRNHPAARLMSALMDLELVNHASMS  
 MYC4 RMSNNLVGGKLDLDIDVKIIGWDMIRIQCSKRNHPAARLMAALMELDLVNHASVS  
 . . . . \* : : : \* : \*\*:\*:\*:\* \* \*\*:\*:\* \* \*\*:\*:\* \* \*\*:\*:\* \*

MYC2 VVNDLMIQQATVKMGFRITYQEQLRASLISKIG---  
 MYC4 VVNDLMIQQATVKMGSFRITYQEQLRSALTSKVGGDVR  
 \*\*:\*:\*:\* \* \*\*:\*:\* \* \*\*:\*:\* \* \*\*:\*:\* \*

**Figure S5:** Sequence alignment showed that AtBGLU12 and BGLU42 of peanut had 44% identity **A**, and *AtMYC2* had 45.7% identity with peanut *MYC4* **B**.



A

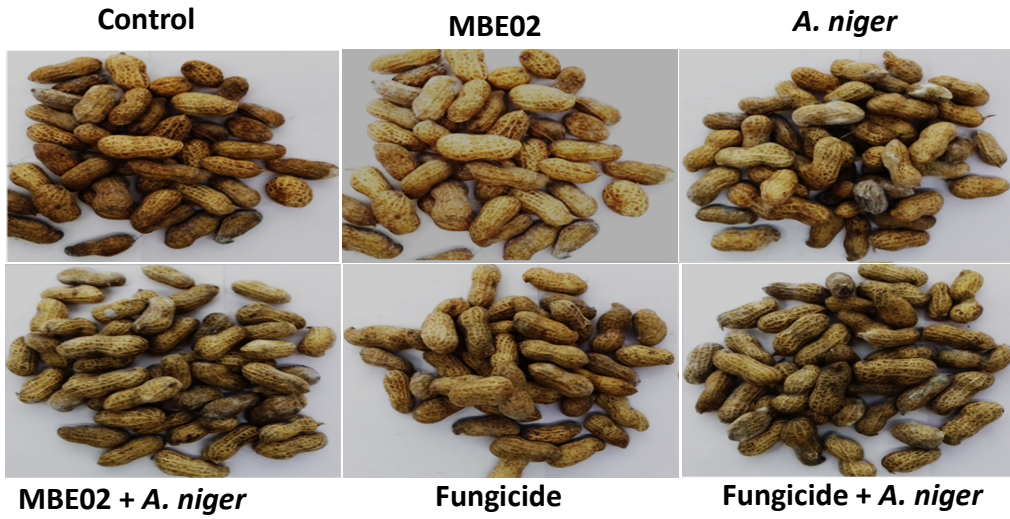

B

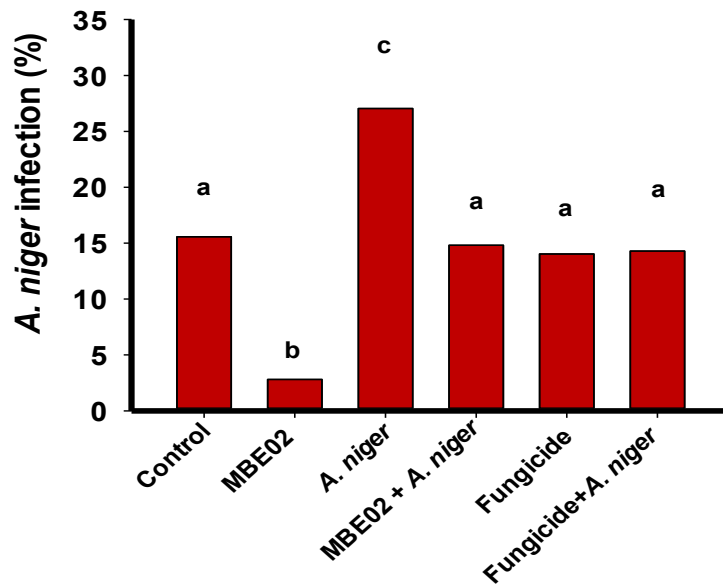

**Figure S6: *In vitro* pod colonization assay with *A. niger* in presence of MBE02.** (a) and (b) respectively show that peanut seeds were incubated with control (water only), MBE02 (O.D. 0.6), *A. niger* ( $10^6$  spore/ml) and fungicide for 30 min. After incubation, half seeds from MBE02 and fungicide treatment were incubated with *A. niger* ( $10^6$  spore/ml) for 30 min and kept in the dark for 72 h. Data are means  $\pm$  SE (n=30-50). Picture of a representative plate is shown. Different letter shows statistical difference among the treatments calculated by SNK test ( $p < 0.05$ ).

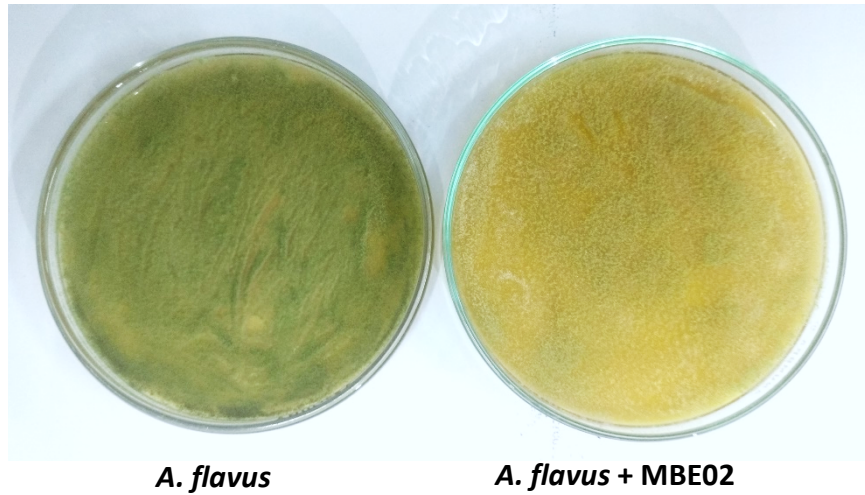

**Figure S7. MBE02 alters the growth of *A. flavus*.** Plate assay to show inhibitory effect of MBE02 on *A. flavus*. Spore suspension of fungi ( $10^6$  spores/ml) were spreaded throughout the plate and inoculated with two spots of 5 $\mu$ l MBE02 (O.D. 0.6) followed by incubation at  $25\pm 2^\circ\text{C}$ . Picture was taken after 7 days of incubation.
