# Supplementary material for: A halotolerant growth promoting rhizobacteria triggers induced systemic resistance in plants and defends against fungal infection
Source: PubMed Central journal article supplement (PMC6411892; doi:10.1038/s41598-019-40930-x), 2019-03-11
Supplement: 41598_2019_40930_MOESM5_ESM.pdf [file 41598_2019_40930_MOESM5_ESM.pdf]

## GO enrichment

**Table S4.** Gene ontology enrichment for differentially expressed genes in MBE02 treatment than the control. GO analysis was performed with Blast2GO as described in the text.

### Biological Process

| GO_ID      | GO term                                    | Frequency | P-value     | log10 p-value |
|------------|--------------------------------------------|-----------|-------------|---------------|
| GO:0016310 | phosphorylation                            | 7.764%    | 6.17163E-05 | -4.2096       |
| GO:0009058 | biosynthetic process                       | 31.611%   | 0.000829469 | -3.0812       |
| GO:0006355 | regulation of transcription, DNA-templated | 9.917%    | 0.00128736  | -2.8903       |
| GO:0006351 | transcription, DNA-templated               | 10.659%   | 0.00128736  | -2.8903       |
| GO:0055114 | oxidation-reduction process                | 15.060%   | 0.002156751 | -2.6662       |
| GO:0006952 | defense response                           | 0.568%    | 0.003274161 | -2.4849       |

### Cellular component

| GO_ID      | GO term                        | Frequency | P-value     | log10 p-value |
|------------|--------------------------------|-----------|-------------|---------------|
| GO:0005634 | nucleus                        | 8.965%    | 0.00054325  | -3.265        |
| GO:0016020 | membrane                       | 61.592%   | 7.87046E-05 | -4.104        |
| GO:0016021 | integral component of membrane | 55.868%   | 0.030040005 | -1.5223       |
| GO:0005737 | cytoplasm                      | 26.017%   | 0.00054325  | -3.265        |

### Molecular function

| GO_ID      | GO term                                          | Frequency | P-value     | log10 p-value |
|------------|--------------------------------------------------|-----------|-------------|---------------|
| GO:0004672 | protein kinase activity                          | 3.390%    | 6.17163E-05 | -4.2096       |
| GO:0000166 | nucleotide binding                               | 20.185%   | 6.17163E-05 | -4.2096       |
| GO:0016747 | transferase activity, transferring acyl groups   | 2.285%    | 0.000829469 | -3.0812       |
| GO:0003700 | transcription factor activity, sequence-specific | 4.217%    | 0.00128736  | -2.8903       |
| GO:0003677 | DNA binding                                      | 12.549%   | 0.00128736  | -2.8903       |
| GO:0046872 | metal ion binding                                | 15.425%   | 0.002156751 | -2.6662       |
| GO:0043531 | ADP binding                                      | 0.183%    | 0.003274161 | -2.4849       |
| GO:0005215 | transporter activity                             | 8.494%    | 0.00414763  | -2.3822       |
| GO:0016758 | transferase activity, transferring hexosyl group | 0.898%    | 0.030040005 | -1.5223       |
| GO:0016740 | transferase activity                             | 21.036%   | 0.031174536 | -1.5062       |
